# Supplementary material for: Automating and improving GHG emissions calculation in pharma/fine chemicals synthesis R&D: GreenSpeed as a digital tool to navigate complex value chains
Source: Royal Society of Chemistry journal article supplement (doi:10.1039/d5su00636h), 2026-01-01
Supplement: d5su00636h1.pdf [file d5su00636h1.pdf]

## Supporting Information

### Automating and improving GHG emissions calculation in pharma / fine chemicals synthesis R&D: GreenSpeed as a digital tool to navigate complex value chains

Alexander Dauth\*, Benjamin Kühne\*, Helmut Hänsel, Sara Wirsing, Kerstin Hell, Heinrich Becker, Isabelle Georg, Andreas Bathe, Bertram Cezanne

#### Data Availability

GreenSpeed was coded using The Julia Programming Language (<https://julialang.org/>) and is hosted on internal servers at Merck KGaA.

The ELNs used at Merck KGaA and connected to GreenSpeed are Revvity Signals (<https://revvitysignals.com/>) and ELAB by enso Software (<https://www.enso-software.com/>)

Merck KGaA's Synthia® can be accessed through <https://www.synthiaonline.com/>

Merck KGaA's DOZN™ can be accessed through <https://www.sigmaaldrich.com/DE/en/services/software-and-digital-platforms/dozn-tool>

All other tools, standards, legal texts and white papers can be accessed as referenced in the main article

#### GreenSpeed Core features:

The landing page is kept intentionally lean, only requiring the input of experiment IDs and the choice of the source ELN.

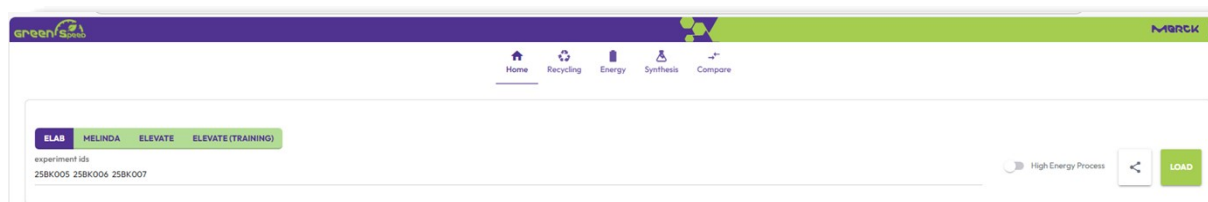

Figure 1. GreenSpeed landing page – only experiment IDs from ELN need to be entered (e.g. via copy & paste).

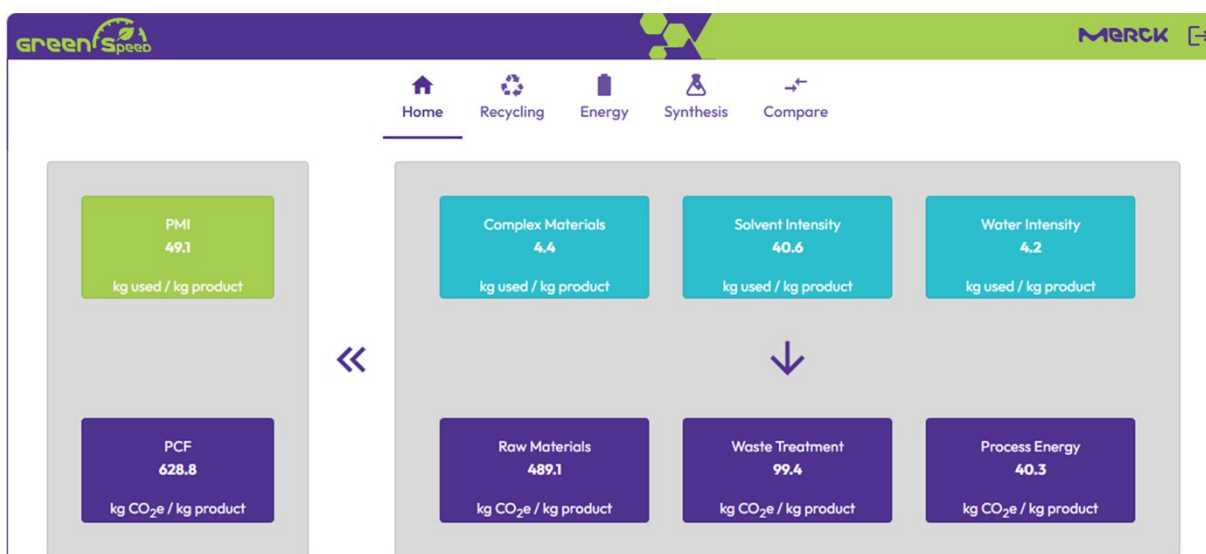

Figure 2. PMI and PCF overview screen.

The most important KPIs are printed in the boxes on top of the page as shown in Figure 1.

$$\text{Process Mass Intensity (PMI)} = \frac{\sum \text{mass of materials}}{\text{mass of isolated product}}$$

$$\text{Solvent Intensity (SI)} = \frac{\sum \text{mass of used solvents}}{\text{mass of isolated product}}$$

$$\text{Water Intensity (WI)} = \frac{\sum \text{mass of water in the process}}{\text{mass of isolated product}}$$

$$\text{Complex Materials} = \text{PMI} - \text{SI} - \text{WI}$$

The colors of the box for PMI give a qualitative assessment of the greenness of the process with regard to resource consumption (green: good, avg. step PMI < 20, yellow: ok, avg. step PMI < 40, red: bad, avg. step PMI > 40). This relies on experience values from standard organic synthesis processes for complex small molecules in organic solvent and might not be applicable for more exotic processes.

The Product Carbon Footprint (PCF, estimated total CO<sub>2</sub> release, Cradle-to-Grave) is approximated as the sum of three contributions: Raw Materials CF + Waste Treatment + Process Energy.

**Raw Materials CF** is calculated from carbon footprint factors for each material. If no factor can be found in either the expert list or proxy list, it defaults to role-based factors. Alternatively, a custom carbon factor can be entered manually (see also What-If Scenarios – Modify Carbon Footprint)

1. **Expert List:** This data source includes a curated selection of carbon footprint data derived from supplier information and secondary databases combined with expert assessments. The entries in this list are limited, focusing on the most relevant and reliable data sources to ensure a high accuracy in the PCF calculations. Most common solvents and frequently used raw materials are covered here.
2. **Proxy List:** The proxy list was developed using a combination of carbon footprint mapping methodologies that consider both spend-based and weight-based approaches. It has a wider coverage, but lower data quality compared to the Expert List.

3. **Role-Based Classification:** This classification organizes raw materials based on their roles in the synthesis process. It includes the following categories: reactant / chemical building block (100 kg CO<sub>2</sub>e/kg), reagent (5 kg CO<sub>2</sub>e/kg), catalyst (1000 kg CO<sub>2</sub>e/kg), solvent (4.9 kg CO<sub>2</sub>e/kg), and water (0.001 kg CO<sub>2</sub>e/kg). This is the fall-back option if no data is found for chemicals via the other sources and defaults to pre-set values for the applied roles. The values chosen for the various roles were based on rounded averages for the different categories. The catalyst footprints relate to precious metals and include recycling rates (often >90 %).

The **Waste Treatment** contribution is based on Complex Materials, SI and WI and assigns a factor for the treatment of each group.  $\text{Waste CF} = \text{Solvent Intensity} * 2.3 + \text{Water Intensity} * 0.63 + \text{Complex Materials} * 0.78$  [kg per kg product]

**Process Energy** can be approximated using the energy tab and otherwise defaults to a correlation to the PMI. The option “High Energy Process” can be chosen for a different correlation factor considering processes with an unusually high energy demand (e.g. calcinations or sublimations):

Regular processes:  $0.82 \text{ (kg CO}_2\text{/kg Product)} * \text{PMI}$

High energy processes:  $2.45 * \text{PMI}$

These correlations are based on calculations and averages from almost 40 internal organic production processes from all of Merck KGaA’s business sectors on manufacturing scale.

The table shown in Figure 2 lists the same KPIs as defined above.

The top rows (“cumulated/final”) show cumulated KPIs, these are the KPIs per 1 kg of the product of this step including the steps before.

The bottom rows (“step”) present the KPIs for the single steps. This can be used this to identify the step which should be most urgently optimized.

| Experiment ID | Mode                   | PMI (without Cleaning) | PMI  | Carbon Footprint (cradle-to-gate) [kg/kg prod.] [1] | Solvent-Intensity | Water-Intensity | Complex-Materials | Raw Materials CF | Process Energy [3] | Waste Treatment [2] |
|---------------|------------------------|------------------------|------|-----------------------------------------------------|-------------------|-----------------|-------------------|------------------|--------------------|---------------------|
| elab:25BK003  | FINAL STEP (cumulated) | 49.1                   | 49.1 | 628.8                                               | 40.6              | 4.2             | 4.4               | 489.1            | 40.3               | 99.4                |
| elab:25BK003  | cumulated              | 33.6                   | 33.6 | 451.6                                               | 25.9              | 4.2             | 3.6               | 359              | 27.6               | 65                  |
| elab:25BK003  | cumulated              | 13.3                   | 13.3 | 282.5                                               | 7.2               | 3.6             | 2.6               | 250.9            | 10.9               | 20.8                |
| elab:25BK003  | step                   | 16.7                   | 16.7 | 281.6                                               | 14.9              | 0               | 1.9               | 232.2            | 13.7               | 35.7                |
| elab:25BK003  | step                   | 19.2                   | 19.2 | 240                                                 | 17.5              | 0               | 1.7               | 182.6            | 15.8               | 41.6                |
| elab:25BK003  | step                   | 13.3                   | 13.3 | 282.5                                               | 7.2               | 3.6             | 2.6               | 250.9            | 10.9               | 20.8                |

Records per page: All 1-6 of 6

DOWNLOAD KPIS

[1] Estimated total CO<sub>2</sub> release, Cradle-to-Gate (Raw Materials CF + Waste Treatment + Process Energy); [2] Raw Materials CF + (Solvent Intensity \* 2.3 + Water Intensity \* 0.63 + Complex Materials \* 0.76) (kg per kg product); [3] Carbon Footprint from Process Energy (kg CO<sub>2</sub>/kg Product) can either be estimated using the energy tab or defaults to a 0.82 (kg CO<sub>2</sub>/kg Product) \* PMI (for high-energy processes 2.45 \* PMI). This calculation is based on internal calculations.

Figure 3. PMI and PCF evaluation table

## Extended features:

**Direct Comparison:** Two or more synthesis routes can be directly compared and the difference in PMI, PCF and other metrics can be displayed graphically and in table-form (Figure 3). This facilitates identification and quantification of the route with the lowest environmental impact among several candidates. Often, this feature is also used to show the improvement of the same synthesis after process development and optimization.

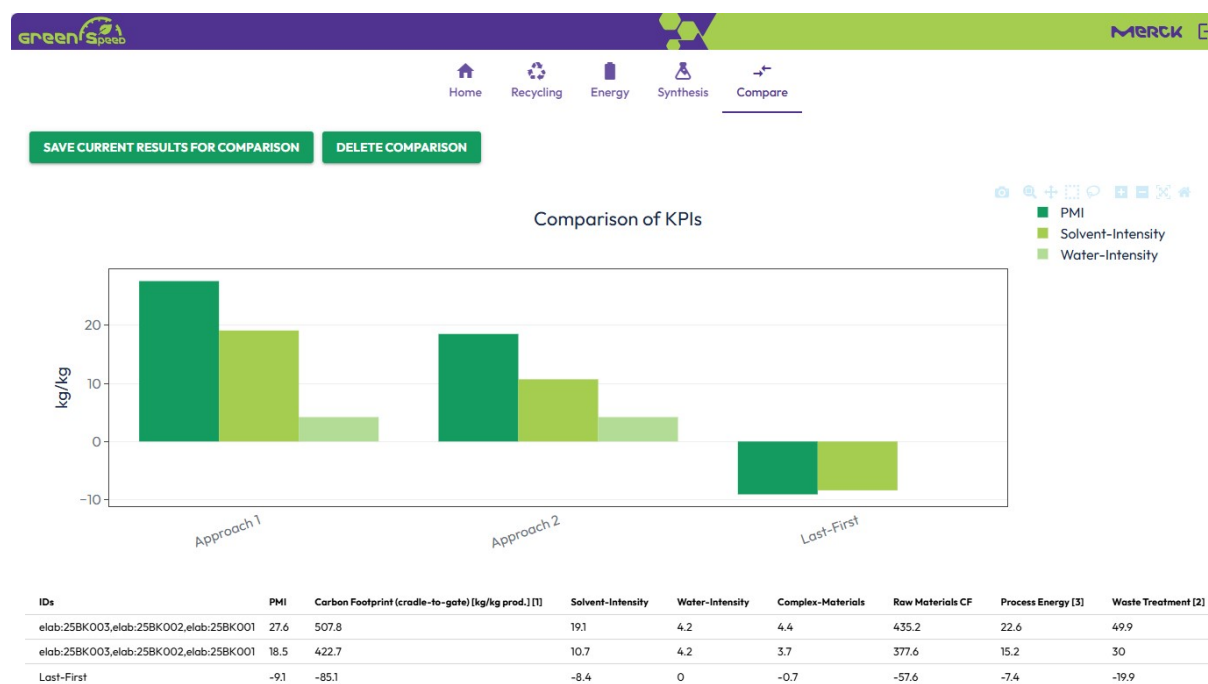

Figure 4. Direct comparison of two synthesis routes.

**What-if Scenarios:** Users can modify material quantities (1) and raw material footprints (2) to evaluate the implications of different choices on sustainability metrics. The source of the carbon footprint is shown (3) to allow an assessment of the overall data quality. The effect of e.g. omitting a work-up step or substituting a raw material with a low PCF alternative can be evaluated (Figure 4).

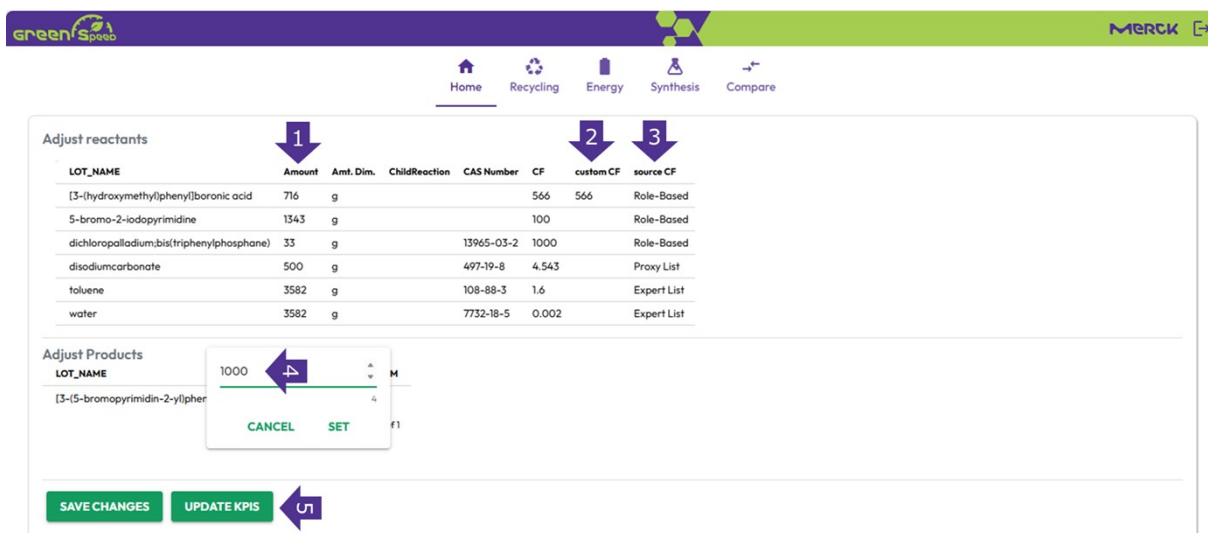

Figure 5. Adjusting quantities and carbon footprints manually allows for scenario modeling.

**Similarity Search:** This feature enables researchers to identify similar transformations among all of Merck KGaA's ELN entries, providing yield vs PMI plots that visualize potential improvements for any organic synthesis step that has been documented in the ELN. Through this, expected targets can be set for new reactions and previous work can inform new approaches.

The degree of similarity can be adjusted through a slider to retrieve more focused or wider reaching results (Figure 5).

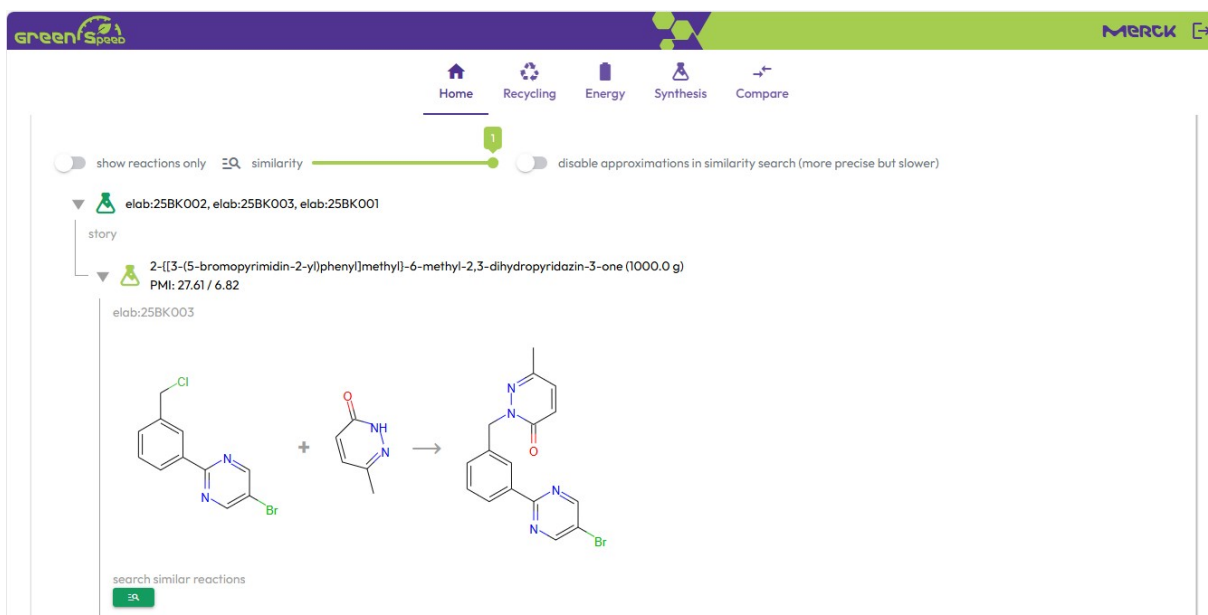

Figure 6. Similarity search can be performed on individual steps, selecting the degree of similarity.

The experiments found are displayed in tabular form and in a Yield vs. PMI graph (Figure 6) which plots PMI and yield of all similar entries retrieved from the ELN. This can be used to compare an ELN entry of interest to previous work. The details of the entries with lower PMI/higher yield can be used

to improve a given process. The color code differentiates between entries made for lab work vs. pilot plant. The latter entries are often of notably higher data quality.

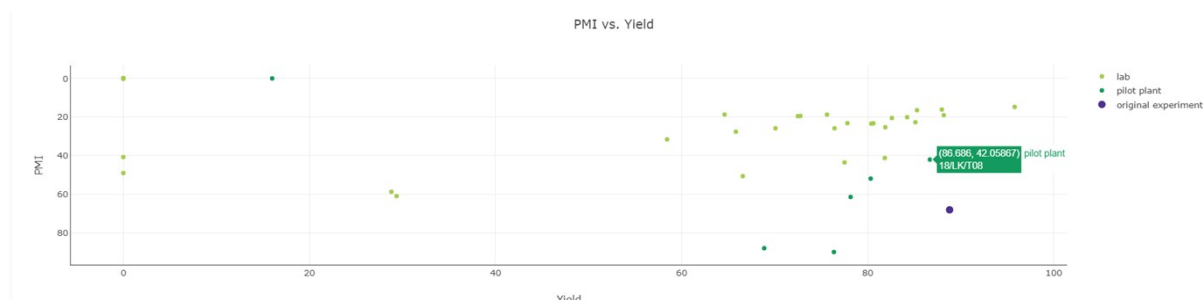

Figure 7. Yield vs PMI plot of similar experiments.

**Recycling Assessment:** The application evaluates the recycling potential of materials used in synthesis, promoting practices aligned with the principles of circular economy. Individual waste streams can be marked for recycling and the effect on the waste treatment footprint is displayed (Figure 8). This enables scientists to not only develop processes but also consider by-products and devise recycling routines.

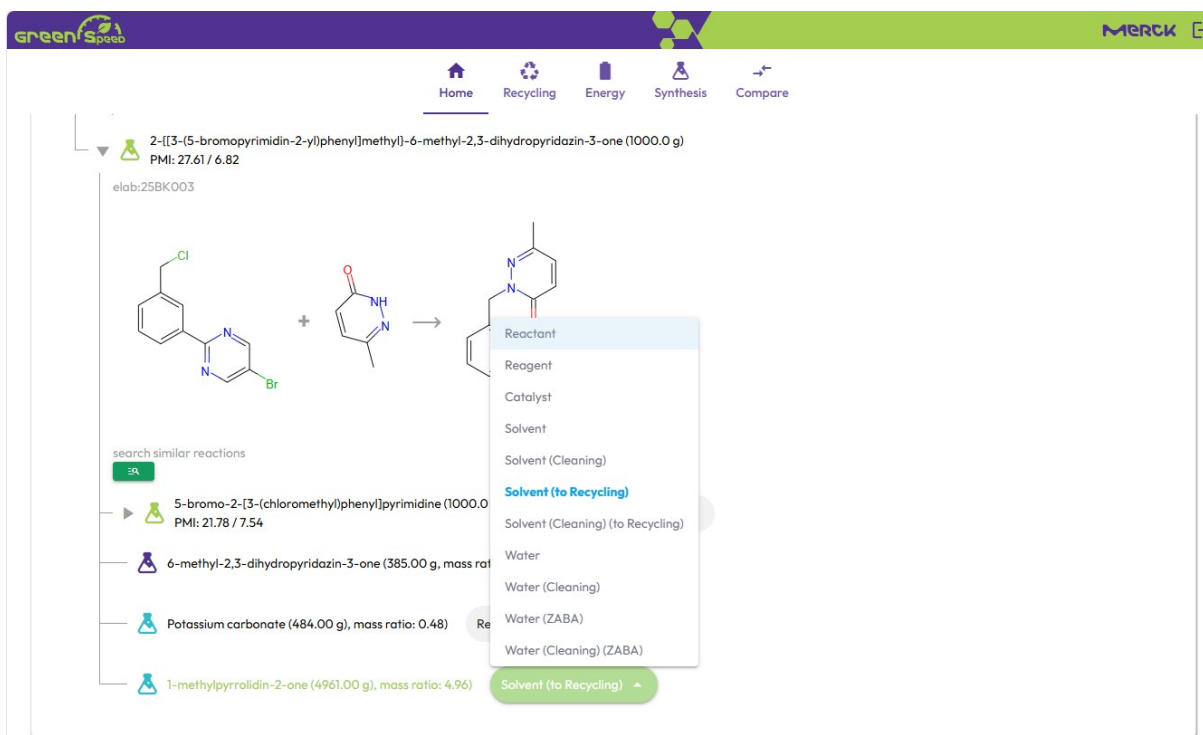

Figure 8. Selection of individual solvent streams for recycling.

The recycling percentage defaults to the estimate that 80% of solvent can be gained back (Figure 8). This includes actual loss from incomplete recycling but also approximately accounts for the energy which needs to be employed to recycle the solvents. Water is approximated to be fully transferred back after treatment. It is also possible to individually define the percentages of the (selected) water and solvent streams to be recycled.

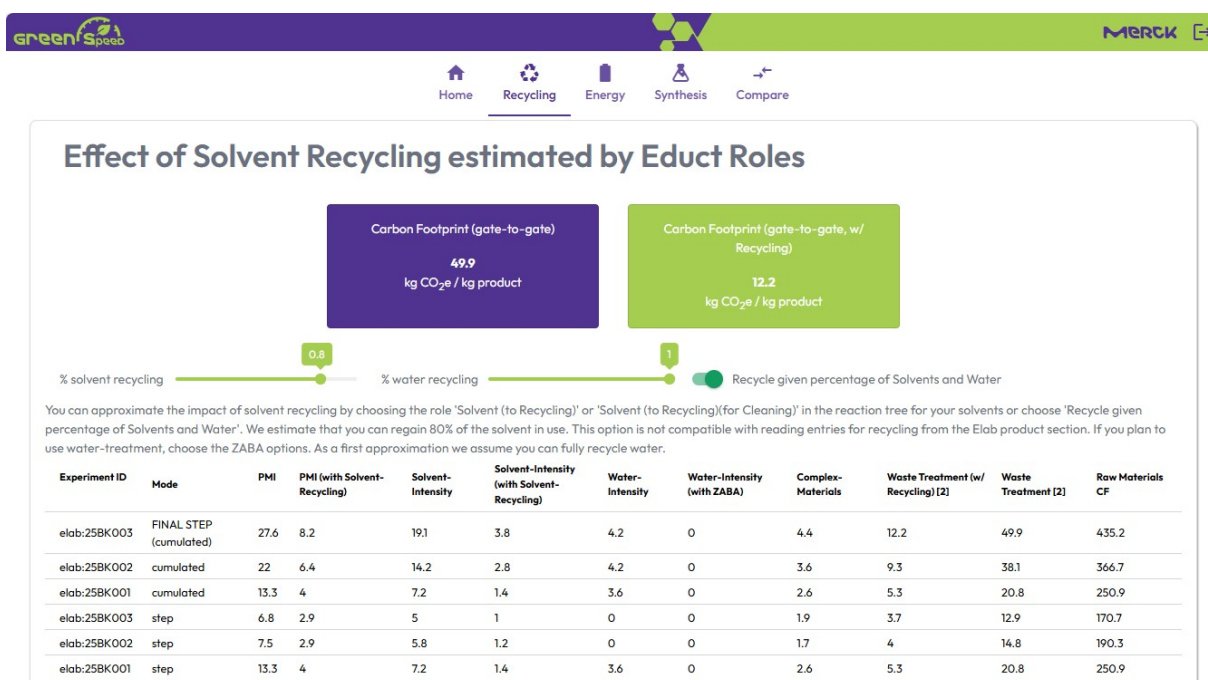

Figure 9. Potential GHG emissions reduction through solvent recycling.

### GreenSpeed PMI and PCF calculation results for starting materials 1, 2, and 3:

Detailed breakdown of PMI and PCF to the main contributors is shown. The life cycle inventory for each synthesis is based on the modeling principles and chemical equations shown in Scheme 1 in the publication.

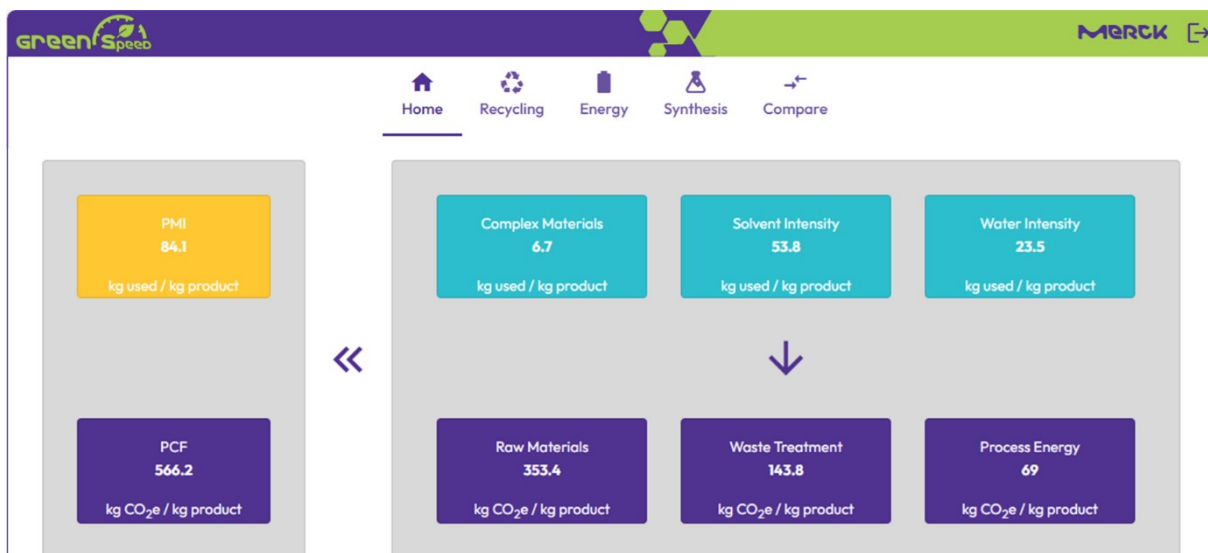

Figure 10. PMI and PCF calculation for starting material 1.

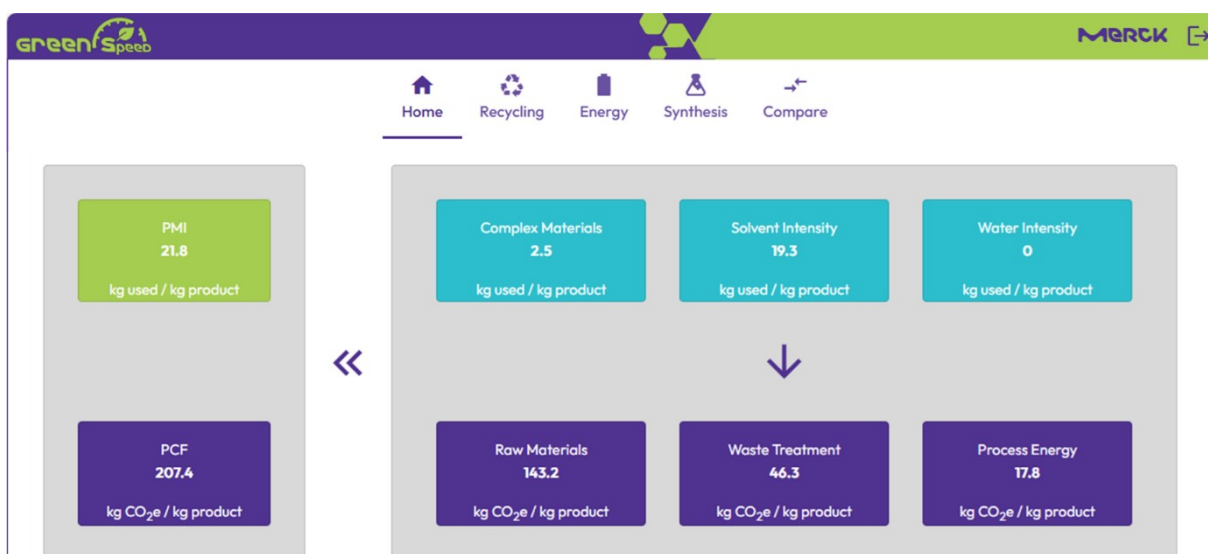

Figure 11. PMI and PCF calculation for starting material 2.

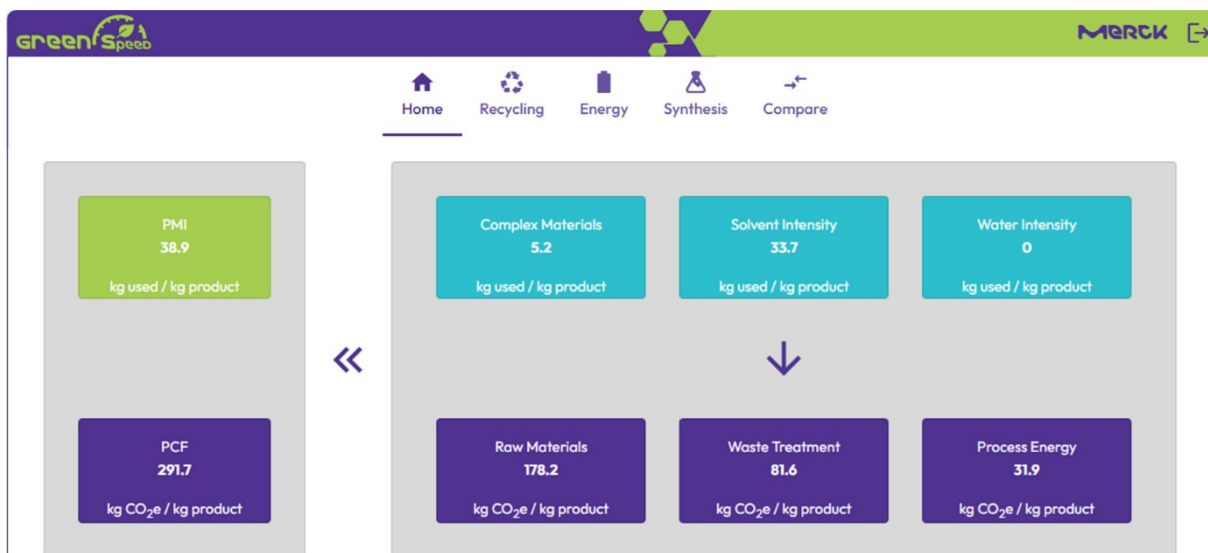

Figure 12. PMI and PCF calculation for starting material 3.

**OpenLCA calculation results for starting materials 1, 2, and 3:**



| Inputs/Outputs - API Building Block #1   [3-(hydroxymethyl)phenyl]boronic acid   Starting Material #1            |           |      |
|------------------------------------------------------------------------------------------------------------------|-----------|------|
| ▼ Inputs                                                                                                         |           |      |
| Flow                                                                                                             | Amount    | Unit |
| benzoic acid                                                                                                     | 1.57000   | kg   |
| bromine                                                                                                          | 2.14600   | kg   |
| electricity, low voltage                                                                                         | 150.00000 | kWh  |
| heat, from steam, in chemical industry                                                                           | 492.00000 | MJ   |
| lithium                                                                                                          | 0.52700   | kg   |
| lithium                                                                                                          | 0.39000   | kg   |
| sulfuric acid                                                                                                    | 1.26100   | kg   |
| tetrahydrofuran                                                                                                  | 30.83900  | kg   |
| tetrahydrofuran                                                                                                  | 22.94600  | kg   |
| trimethyl borate                                                                                                 | 0.85600   | kg   |
| water, completely softened                                                                                       | 69.00000  | kg   |
| water, ultrapure                                                                                                 | 23.54400  | kg   |
| ▼ Outputs                                                                                                        |           |      |
| Flow                                                                                                             | Amount    | Unit |
| [3-(hydroxymethyl)phenyl]boronic acid                                                                            | 1.00000   | kg   |
| hazardous waste, for incineration                                                                                | 59.53500  | kg   |
| wastewater, average                                                                                              | 92.54400  | m3   |
| General information   Inputs/Outputs   Documentation   Parameters   Allocation   Social aspects   Direct impacts |           |      |

Figure 13. Life Cycle Inventory (LCI) in OpenLCA to evaluate environmental footprints for starting material 1, used to benchmark GreenSpeed calculations as shown in Table 1 in the paper.

| Inputs/Outputs - API Building Block #2   2-iodo-5-bromo pyrimidine   Starting Material #2                        |           |      |
|------------------------------------------------------------------------------------------------------------------|-----------|------|
| ▼ Inputs                                                                                                         |           |      |
| Flow                                                                                                             | Amount    | Unit |
| acetonitrile                                                                                                     | 19.27200  | kg   |
| aminopyridine                                                                                                    | 0.52200   | kg   |
| electricity, low voltage                                                                                         | 57.00000  | kWh  |
| heat, from steam, in chemical industry                                                                           | 189.00000 | MJ   |
| N-bromosuccinimide                                                                                               | 0.97600   | kg   |
| N-iodosuccinimide                                                                                                | 0.98700   | kg   |
| water, completely softened                                                                                       | 46.00000  | kg   |
| ▼ Outputs                                                                                                        |           |      |
| Flow                                                                                                             | Amount    | Unit |
| 2-iodo-5-bromo pyrimidine                                                                                        | 1.00000   | kg   |
| hazardous waste, for incineration                                                                                | 19.92169  | kg   |
| wastewater, average                                                                                              | 0.04600   | m3   |
| General information   Inputs/Outputs   Documentation   Parameters   Allocation   Social aspects   Direct impacts |           |      |

Figure 14. Life Cycle Inventory (LCI) in OpenLCA to evaluate environmental footprints for starting material 2, used to benchmark GreenSpeed calculations as shown in Table 1 in the paper.

| Inputs/Outputs - API Building Block #3   Chloro maleic hydrazide   Starting Material #3                          |           |      |
|------------------------------------------------------------------------------------------------------------------|-----------|------|
| ▼ Inputs                                                                                                         |           |      |
| Flow                                                                                                             | Amount    | Unit |
| acetic anhydride                                                                                                 | 1.22200   | kg   |
| electricity, low voltage                                                                                         | 68.00000  | kWh  |
| heat, from steam, in chemical industry                                                                           | 222.00000 | MJ   |
| hydrazine                                                                                                        | 0.38400   | kg   |
| maleic anhydride                                                                                                 | 1.17400   | kg   |
| N-methyl-2-pyrrolidone                                                                                           | 16.10100  | kg   |
| phosphorus oxychloride                                                                                           | 1.46800   | kg   |
| sodium chloroacetate                                                                                             | 0.98200   | kg   |
| triethyl amine                                                                                                   | 17.60700  | kg   |
| water, completely softened                                                                                       | 46.00000  | kg   |
| ▼ Outputs                                                                                                        |           |      |
| Flow                                                                                                             | Amount    | Unit |
| Chloro maleic anhydride                                                                                          | 1.00000   | kg   |
| hazardous waste, for incineration                                                                                | 36.53200  | kg   |
| wastewater, average                                                                                              | 0.04600   | m3   |
| General information   Inputs/Outputs   Documentation   Parameters   Allocation   Social aspects   Direct impacts |           |      |

Figure 15. Life Cycle Inventory (LCI) in OpenLCA to evaluate environmental footprints for starting material 3, used to benchmark GreenSpeed calculations as shown in Table 1 in the paper.

## ACS Streamlined PMI-LCA tool calculation results for starting materials 1, 2, and 3:

| Step Name | Input or Output | LCA Data Source Class | LCA Data Source Subclass             | Display Name                                   | Physical Mass (kg) |
|-----------|-----------------|-----------------------|--------------------------------------|------------------------------------------------|--------------------|
| Step 1    | Input           | iGAL_Aligned_Organic  | Default iGal Aligned Organic Reagent | benzoic acid                                   | 1,57               |
| Step 1    | Input           | Common_Inorganic      | Default Inorganic Material           | potassium bromate                              | 2,15               |
| Step 1    | Input           | Common_Inorganic      | Default Inorganic Material           | sulfuric acid                                  | 1,26               |
| Step 1    | Input           | Common_Solvent        | water, deionized                     | water                                          | 23,55              |
| Step 1    | Output          | None                  | None                                 | 3-Bromobenzoic acid                            | 2,06               |
| Step 2    | Input           | Process_Steps         | Step 1                               | 3-Bromobenzoic acid                            | 2,06               |
| Step 2    | Input           | Common_Inorganic      | Default Inorganic Material           | lithium aluminium hydride                      | 0,39               |
| Step 2    | Input           | Common_Solvent        | tetrahydrofuran (THF)                | THF                                            | 30,84              |
| Step 2    | Output          | None                  | None                                 | (3-bromophenyl)methanol                        | 1,53               |
| Step 3    | Input           | Process_Steps         | Step 2                               | (3-bromophenyl)methanol                        | 1,53               |
| Step 3    | Input           | iGAL_Aligned_Organic  | Default iGal Aligned Organic Reagent | butyl lithium                                  | 0,53               |
| Step 3    | Input           | Common_Inorganic      | Default Inorganic Material           | methyl borate                                  | 0,86               |
| Step 3    | Input           | Common_Solvent        | tetrahydrofuran (THF)                | THF                                            | 22,95              |
| Step 3    | Output          | None                  | None                                 | [3-(hydroxymethyl)phenyl]boronic acid          | 1,00               |
| PACKAGE   | Input           | Process_Steps         | Step 3                               | [3-(hydroxymethyl)phenyl]boronic acid          | 1,00               |
| PACKAGE   | Output          | None                  | None                                 | Packaged [3-(hydroxymethyl)phenyl]boronic acid | 1,00               |

| Process Metrics per kg API           | Total  | Reagent | Metal | Solvent | Water |
|--------------------------------------|--------|---------|-------|---------|-------|
| PMI                                  | 84,1   | 6,8     | 0,0   | 53,8    | 23,6  |
| Mass Net (kg)                        | 209,3  | 10,6    | 0,0   | 198,7   | 0,0   |
| Energy (MJ)                          | 7008,6 | 206,5   | 0,0   | 6801,7  | 0,4   |
| GWP (kg CO2 equiv.)                  | 319,6  | 11,9    | 0,0   | 307,7   | 0,0   |
| Acidification (kg SO2 equiv.)        | 1,1    | 0,1     | 0,0   | 1,0     | 0,0   |
| Eutrophication (kg phosphate equiv.) | 0,4    | 0,0     | 0,0   | 0,4     | 0,0   |
| Water (kg)                           | 1146,1 | 34,0    | 0,0   | 1082,3  | 29,8  |
| COG (USD)                            | 0,0    | 0,0     | 0,0   | 0,0     | 0,0   |

Figure 16. Life Cycle Inventory (LCI) and results in Streamlined PMI-LCA tool for starting material 1 synthesis, used to benchmark GreenSpeed calculations as shown in Table 1 in the paper.

| Step Name | Input or Output | LCA Data Source Class | LCA Data Source Subclass                 | Display Name                       | Physical Mass (kg) |
|-----------|-----------------|-----------------------|------------------------------------------|------------------------------------|--------------------|
| Step 1    | Input           | Non_iGAL_Aligned_Orga | Default Non-iGAL Aligned Organic Reagent | 2-amino pyrimidine                 | 0,52               |
| Step 1    | Input           | iGAL_Aligned_Organic  | Default iGal Aligned Organic Reagent     | N-bromosuccinimide                 | 0,98               |
| Step 1    | Input           | Common_Solvent        | acetonitrile                             |                                    | 7,82               |
| Step 1    | Output          | None                  | None                                     | 2-amino-5-bromo pyrimidine         | 0,76               |
| Step 2    | Input           | Process_Steps         | Step 1                                   | 2-amino-5-bromo pyrimidine         | 0,76               |
| Step 2    | Input           | iGAL_Aligned_Organic  | Default iGal Aligned Organic Reagent     | N-iodosuccinimide                  | 0,99               |
| Step 2    | Input           | Common_Solvent        | acetonitrile                             |                                    | 11,45              |
| Step 2    | Output          | None                  | None                                     | 2-iodo-5-bromo pyrimidine          | 1,00               |
| PACKAGE   | Input           | Process_Steps         | Step 2                                   | 2-iodo-5-bromo pyrimidine          | 1,00               |
| PACKAGE   | Output          | None                  | None                                     | Packaged 2-iodo-5-bromo pyrimidine | 1,00               |

| Process Metrics per kg API           | Total  | Reagent | Metal | Solvent | Water |
|--------------------------------------|--------|---------|-------|---------|-------|
| PMI                                  | 21,8   | 2,5     | 0,0   | 19,3    | 0,0   |
| Mass Net (kg)                        | 68,5   | 29,3    | 0,0   | 39,2    | 0,0   |
| Energy (MJ)                          | 2319,8 | 649,1   | 0,0   | 1670,7  | 0,0   |
| GWP (kg CO2 equiv.)                  | 114,7  | 55,9    | 0,0   | 58,7    | 0,0   |
| Acidification (kg SO2 equiv.)        | 0,7    | 0,4     | 0,0   | 0,3     | 0,0   |
| Eutrophication (kg phosphate equiv.) | 0,2    | 0,1     | 0,0   | 0,2     | 0,0   |
| Water (kg)                           | 267,4  | 37,3    | 0,0   | 230,2   | 0,0   |
| COG (USD)                            | 0,0    | 0,0     | 0,0   | 0,0     | 0,0   |

Figure 17. Life Cycle Inventory (LCI) and results in Streamlined PMI-LCA tool for starting material 2 synthesis, used to benchmark GreenSpeed calculations as shown in Table 1 in the paper.

| Step Name | Input or Output | LCA Data Source Class | LCA Data Source Subclass                 | Display Name                     | Physical Mass (kg) |
|-----------|-----------------|-----------------------|------------------------------------------|----------------------------------|--------------------|
| Step 1    | Input           | iGAL_Aligned_Organic  | Default iGal Aligned Organic Reagent     | Maleic anhydride                 | 1,17               |
| Step 1    | Input           | iGAL_Aligned_Organic  | Default iGal Aligned Organic Reagent     | Hydrazine                        | 0,38               |
| Step 1    | Input           | Common_Solvent        | triethanolamine (TEA)                    | triethylamine                    | 17,61              |
| Step 1    | Input           | iGAL_Aligned_Organic  | Default iGal Aligned Organic Reagent     | acetic anhydride                 | 1,22               |
| Step 1    | Input           | iGAL_Aligned_Organic  | Default iGal Aligned Organic Reagent     | sodium acetate                   | 0,98               |
| Step 1    | Output          | None                  | None                                     | Maleic hydrazide                 | 1,07               |
| Step 2    | Input           | Process_Steps         | Step 1                                   | Maleic hydrazide                 | 1,07               |
| Step 2    | Input           | Common_Inorganic      | Default Inorganic Material               | phosphoryl chloride              | 1,47               |
| Step 2    | Input           | Common_Solvent        | 1-methyl-2-pyrrolidinone/N-methyl pyrrol | 1-methylpyrrolidin-2-one         | 16,10              |
| Step 2    | Output          | None                  | None                                     | Chloro maleic anhydride          | 1,00               |
| PACKAGE   | Input           | Process_Steps         | Step 2                                   | Chloro maleic anhydride          | 1,00               |
| PACKAGE   | Output          | None                  | None                                     | Packaged Chloro maleic anhydride | 1,00               |

| Process Metrics per kg API           | Total  | Reagent | Metal | Solvent | Water |
|--------------------------------------|--------|---------|-------|---------|-------|
| PMI                                  | 38,9   | 5,2     | 0,0   | 33,7    | 0,0   |
| Mass Net (kg)                        | 97,3   | 9,8     | 0,0   | 87,5    | 0,0   |
| Energy (MJ)                          | 3454,0 | 297,3   | 0,0   | 3156,7  | 0,0   |
| GWP (kg CO2 equiv.)                  | 141,3  | 11,9    | 0,0   | 129,4   | 0,0   |
| Acidification (kg SO2 equiv.)        | 0,5    | 0,1     | 0,0   | 0,5     | 0,0   |
| Eutrophication (kg phosphate equiv.) | 0,9    | 0,0     | 0,0   | 0,9     | 0,0   |
| Water (kg)                           | 487,0  | 56,3    | 0,0   | 430,7   | 0,0   |
| COG (USD)                            | 0,0    | 0,0     | 0,0   | 0,0     | 0,0   |

Figure 18. Life Cycle Inventory (LCI) and results in Streamlined PMI-LCA tool for starting material 3 synthesis, used to benchmark GreenSpeed calculations as shown in Table 1 in the paper.
